# Supplementary material for: High-Resolution Transcriptome Atlas and Improved Genome Assembly of Common Buckwheat, Fagopyrum esculentum
Source: PubMed Central journal article supplement (PMC8010679; doi:10.3389/fpls.2021.612382), 2021-03-16

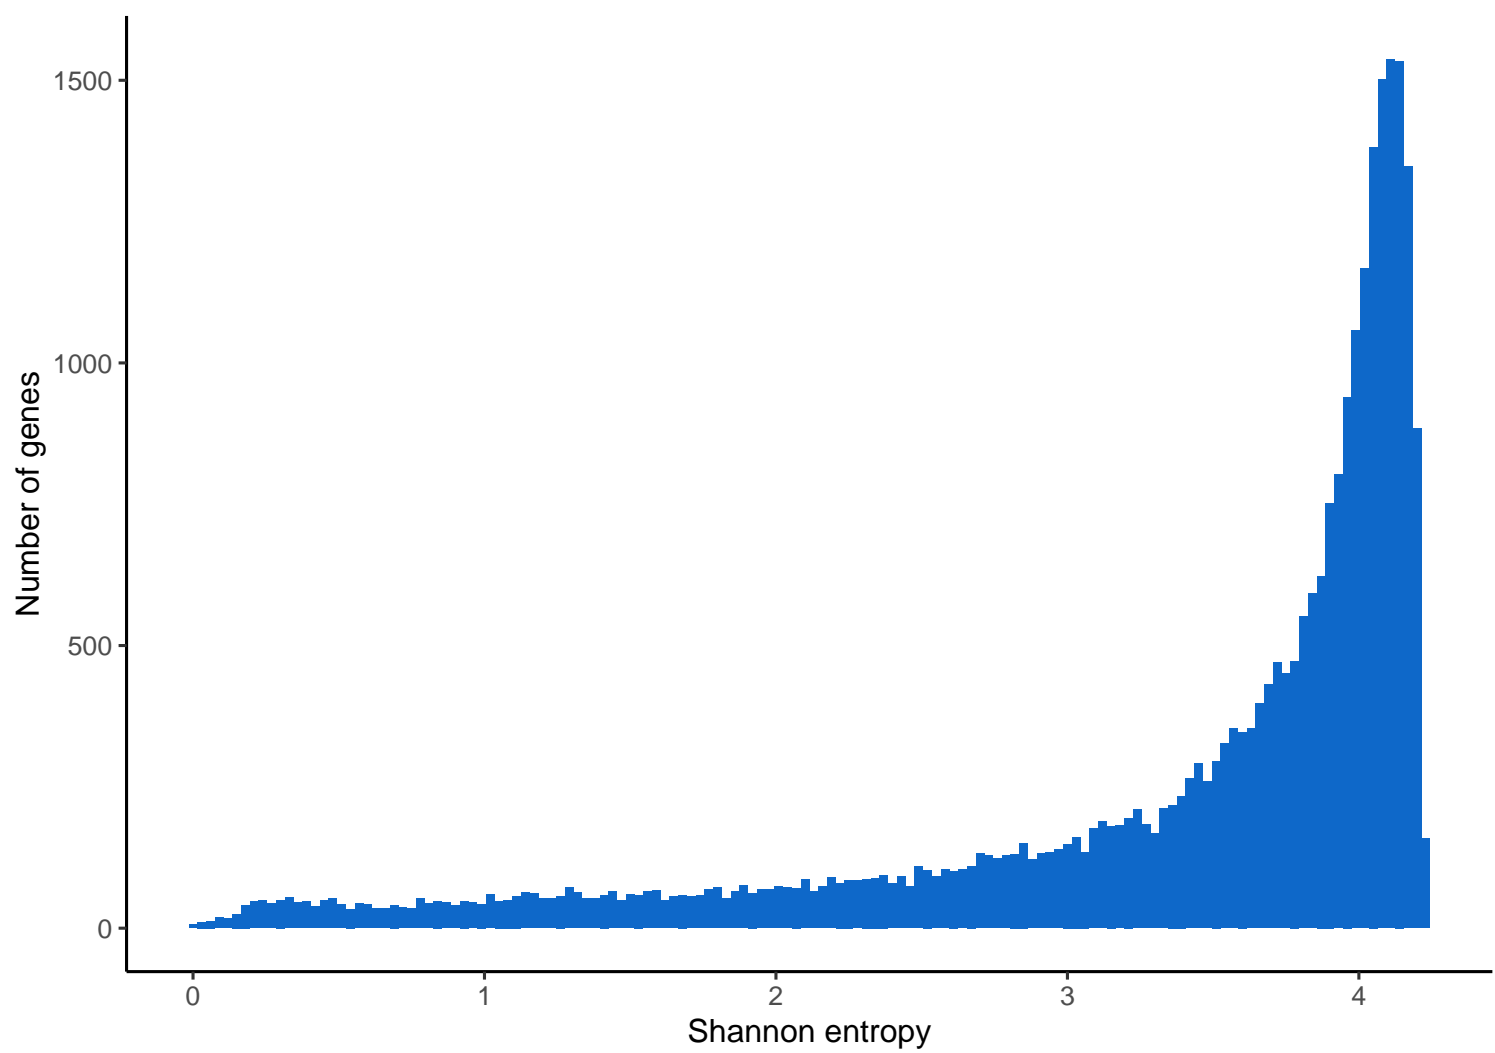

Supplement: Image_2.pdf [file Image_2.pdf]
