# Supplementary material for: High-Resolution Transcriptome Atlas and Improved Genome Assembly of Common Buckwheat, Fagopyrum esculentum
Source: PubMed Central journal article supplement (PMC8010679; doi:10.3389/fpls.2021.612382), 2021-03-16
Supplement: Image_3.pdf [file Image_3.pdf]

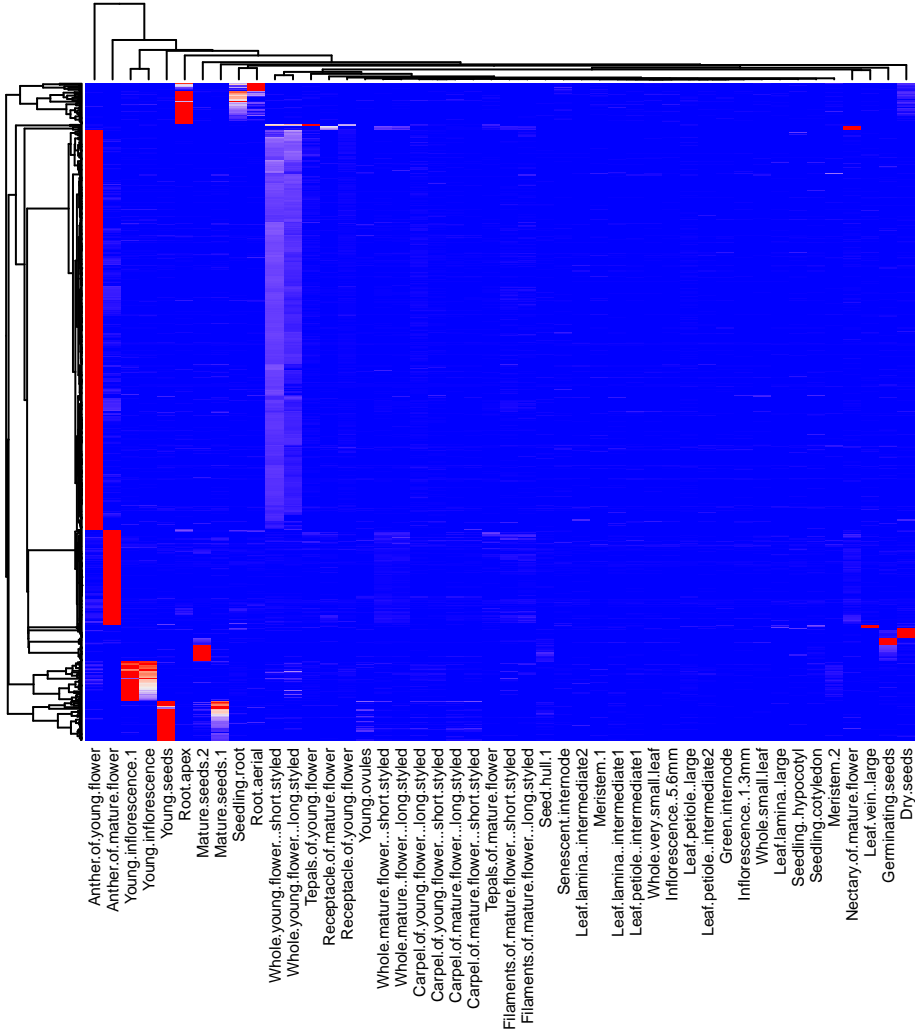

Anther.of.young.flower  
 Anther.of.mature.flower  
 Young.inflorescence.1  
 Young.inflorescence  
 Young.seeds  
 Root.apex  
 Mature.seeds.2  
 Mature.seeds.1  
 Seedling.root  
 Root.aerial  
 Whole.young.flower...short.styled  
 Whole.young.flower...long.styled  
 Tepals.of.young.flower  
 Receptacle.of.mature.flower  
 Receptacle.of.young.flower  
 Young.ovules  
 Whole.mature.flower...short.styled  
 Whole.mature.flower...long.styled  
 Carpel.of.young.flower...long.styled  
 Carpel.of.young.flower...short.styled  
 Carpel.of.mature.flower...long.styled  
 Carpel.of.mature.flower...short.styled  
 Tepals.of.mature.flower  
 Filaments.of.mature.flower...short.styled  
 Filaments.of.mature.flower...long.styled  
 Seed.hull.1  
 Senescent.intermode  
 Leaf.lamina...intermediate2  
 Meristem.1  
 Leaf.lamina...intermediate1  
 Leaf.petiole...intermediate1  
 Whole.very.small.leaf  
 Inflorescence...5.6mm  
 Leaf.petiole...large  
 Leaf.petiole...intermediate2  
 Green.intermode  
 Inflorescence...1.3mm  
 Whole.small.leaf  
 Leaf.lamina...large  
 Seedling...hypocotyl  
 Seedling.cotyledon  
 Meristem.2  
 Nectary.of.mature.flower  
 Leaf.vein...large  
 Germinating.seeds  
 Dry.seeds

matrix\_3

1  
0.5  
0
